# Supplementary material
Source: MDPI journal article supplement (https://www.mdpi.com/2504-3900/8/1/34)
Supplement: s1 [file s1]

# SUGAR SWEETENED BEVERAGE CONSUMPTION IN AUCKLAND PRIMARY SCHOOL CHILDREN

Smirk, E.L.F, Conlon, C.A., Beck, K.L., Gammon, C.S., von Hurst, P.R.

## INTRODUCTION

Sugar sweetened beverage (SSB) consumption has a positive relationship with unhealthy weight gain in children<sup>[1]</sup>. Limiting consumption of SSBs is recommended. Whereas, daily consumption of water and plain low fat milk or other dairy products is recommended<sup>[2]</sup>. The most recent comprehensive beverage consumption data in the 8 to 12 age group was published in 2007, thus recent beverage consumption data is unknown<sup>[3]</sup>.

## AIM

To investigate beverage consumption in 8 to 12 year old Auckland primary school children.

## METHODS

This cross-sectional study evaluated children's beverage consumption using a self-administered questionnaire. Body composition was measured using bioelectrical impedance analysis (BIA).

## RESULTS AND DISCUSSION

Children (n=695, 9.87±0.71 years, 44.8% male) were recruited from 6 schools.

### Beverage intake

- Plain water was consumed by 11.6% <once/day
- Plain milk was consumed by 54.7% <once/day
- All milk-containing beverages were consumed by 10.1% <once/week

Table 1. Consumption of beverages

|                                 | Consumption of Beverages |                  |               |
|---------------------------------|--------------------------|------------------|---------------|
|                                 | Less than once/week      | 1 – 4 times/week | 5+ times/week |
|                                 | %                        | %                | %             |
| Plain water                     | 2.5                      | 4.4              | 93.1          |
| Plain milk                      | 16.4                     | 27.9             | 55.6          |
| Flavoured milk                  | 79.1                     | 14.9             | 6.0           |
| Milkshake or milk drink         | 78.5                     | 16.8             | 4.7           |
| Flavoured powdered milk drink   | 54.4                     | 32.2             | 13.4          |
| Fruit smoothie                  | 79.7                     | 16.3             | 4.0           |
| Juice                           | 61.0                     | 30.7             | 8.3           |
| Powdered fruit drink            | 82.8                     | 11.5             | 5.7           |
| Fruit drink concentrate/cordial | 78.2                     | 16.4             | 5.5           |
| Soft drink                      | 69.4                     | 25.6             | 5.0           |
| Soda stream                     | 94.8                     | 4.4              | 0.7           |
| Diet drinks                     | 90.1                     | 8.0              | 1.9           |
| Energy drinks                   | 97.9                     | 1.5              | 0.6           |
| Sports drinks                   | 93.5                     | 5.0              | 1.5           |
| Flavoured water                 | 91.3                     | 6.1              | 2.7           |
| Tea                             | 74.1                     | 14.9             | 11.0          |
| Coffee                          | 96.2                     | 2.5              | 1.3           |

### Body fat percentage

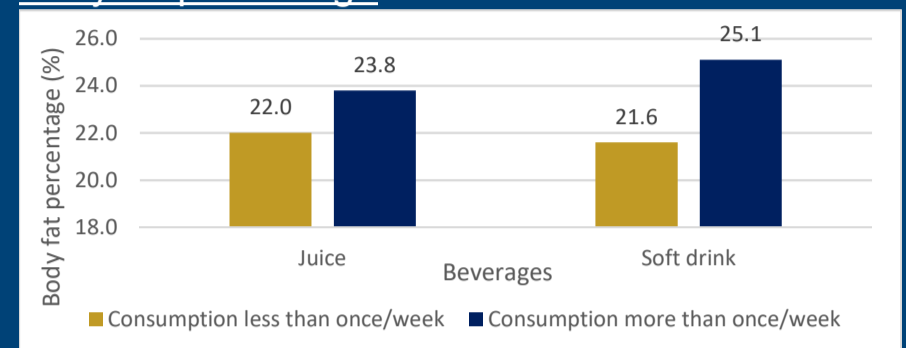

Figure 1. Consumption of beverages and body fat percentage

### School

- Children from low decile schools were 3.9 times more likely to consume soft drinks > once/week.

### Home

- Home availability of soft drinks and fruit juice had a positive relationship with their consumption.
- Children who received a lot of encouragement to consume healthy beverages had a lower SSB consumption.

### SSB consumption outside of school and home

- 28.6% of children consumed a beverage from a fast food or takeaway store > once/week.

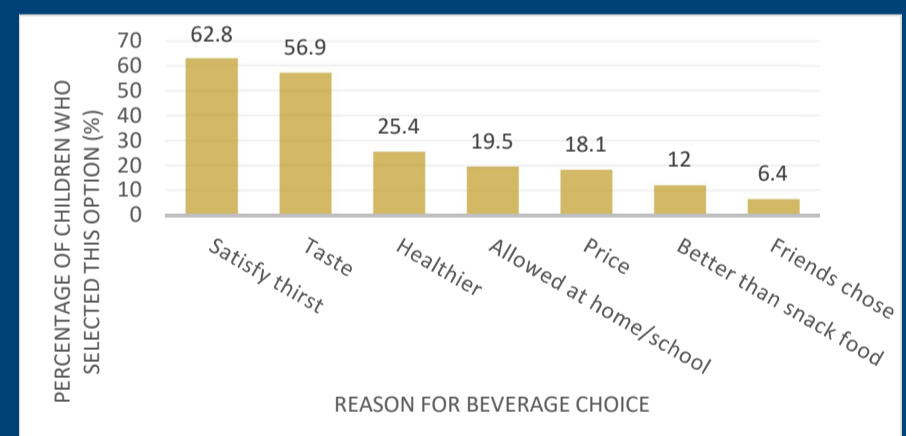

Figure 2. Reason for beverage choice when out

## CONCLUSIONS

An unfavourable proportion of children consumed water less than once per day and milk never/less than once per week. If parents limited SSB home availability and encouraged their children to consume healthy beverages it may contribute to a decrease in their children's SSB consumption. Ensuring healthy beverages are available at fast food/takeaway stores may encourage healthy beverage consumption. Limiting soft drink and juice consumption may help children achieve a healthy body fat percentage.

## ACKNOWLEDGEMENTS

Massey University, Roche Holding AG, and Fonterra Co-operative Group

### REFERENCES:

1. Keller, A., & Della Torre, S. B. (2015). Sugar-Sweetened Beverages and Obesity among Children and Adolescents: A Review of Systematic Literature Reviews. *Childhood Obesity*, 11(4), 338-346. doi:10.1089/chi.2014.0117
2. Ministry of Health. (2012). Food and nutrition guidelines for healthy children and young people (aged 2 - 18 years): A background paper. Wellington: Ministry of Health.
3. National Research Bureau Ltd, *New Zealand children's food and drinks survey*. 2008.
